# Supplementary material for: A remarkable solvent effect toward the Pd/C-catalyzed cleavage of silyl ethersElectronic supplementary information (ESI) available: characterization data and references and supplementary Tables 4 and 5. See http://www.rsc.org/suppdata/cc/b2/b211313a/
Source: Royal Society of Chemistry journal article supplement (doi:10.1039/b211313a), 2003-02-11
Supplement: b211313a.doc [file b211313a.doc]

##### Supplementary Information

Remarkable Solvent Effect toward the Pd/C-catalyzed

Cleavage of Silyl Ether

#### Hironao Sajiki,* Takashi Ikawa, Kazuyuki Hattori and Kosaku Hirota*

Laboratory of Medicinal Chemistry, Gifu Pharmaceutical University,

5-6-1 Mitahora-higashi, Gifu 502-8585, Japan

sajiki@gifu-pu.ac.jp

**General Hydrogenation Procedure of 1.** After two vacuum/H2 cycles to remove air from the reaction tube, the stirred mixture of the substrate **1** (0.5 mmol), 10% Pd/C (10% of the weight of **1**) in an absolute solvent (2 mL) was hydrogenated at ambient pressure (balloon) and temperature (*ca.* 20 °C) for 24 h (only except entry 3 using EtOAc in Table 2, 36 h). The reaction mixture was filtered using a membrane filter (Advantec DISMIC-13cp, 0.45 m) and the filtrate was concentrated *in vacuo*. The conversion of **1** and the products ratio of **2** and **3** were confirmed by TLC and 1H NMR of the crude mixture in CDCl3. The crude mixture was purified by flash silica gel column chromatography, if necessary.

**1-(*tert*-Butyldimethylsilyl)oxy-3-phenyl-2-propene (1a).**1Colorless oil, 1H NMR (400 MHz, CDCl3)  0.11 (s, 6H), 0.94 (s, 9H), 4.35 (d, *J* = 4.9 Hz, 2H), 6.28 (dt, *J* = 4.9 and 15.9 Hz, 1H), 6.59 (d, *J* = 15.9 Hz, 1H), 7.20-7.38 (m, 5H); 13C NMR (100 MHz, CDCl3) -5.17, 18.42, 25.96, 63.85, 126.36, 127.27, 128.46, 129.14, 129.45, 137.09.

**1-(*tert*-Butyldiphenylsilyl)oxy-3-phenyl-2-propene (1b).**2Colorless oil, 1H NMR (400 MHz, CDCl3)  1.09 (s, 9H), 4.38 (d, *J* = 4.9 Hz, 2H), 6.28 (dt, *J* = 4.9 and 15.6 Hz, 1H), 6.64 (d, *J* = 15.6 Hz, 1H), 7.20-7.45 (m, 11H), 7.71 (dd, *J* = 1.5 and 7.8 Hz, 4H); 13C NMR (100 MHz, CDCl3)  19.28, 26.84, 64.49, 126.40, 127.29, 127.68, 128.50, 128.74, 129.43, 129.67, 133.64, 135.56, 137.17.

**1-(Triisopropylsilyl)oxy-3-phenyl-2-propene (1c).**3Colorless oil, 1H NMR (400 MHz, CDCl3)  1.12-1.21 (m, 3H and 18H), 4.46 (d, *J* = 4.9 Hz, 2H), 6.32 (dt, *J* = 4.9 and 15.6 Hz,1H), 6.67 (d, *J* = 15.6 Hz, 1H), 7.24-7.42 (m, 5H); MS (EI) *m/z* 290 (M+, 20%) 248 (21), 247 (100), 117 (47), 115 (15).

**1-(Triethylsilyl)oxy-3-phenyl-2-propene (1d).**4Colorless oil, 1H NMR (400 MHz, CDCl3)  0.66 (q, *J* = 7.9 Hz, 6H), 0.99 (t, *J* = 7.9 Hz, 9H), 4.35 (d, *J* = 5.1 Hz, 2H), 6.29 (dt, *J* = 5.1, 16.1Hz, 1H), 6.60 (d, *J* = 16.1 Hz, 1H), 7.22 (t, *J* = 7.5 Hz, 1H), 7.30 (t, *J* = 7.5 Hz, 2H), 7.37 (d, *J* = 7.5 Hz, 2H); MS (EI) *m/z* 248 (M+, 25%) 220 (14), 219 (100), 117 (87), 115 (23), 91 (13).

**1-(*tert*-Butyldimethylsilyl)oxy-9-decene (1e).**5Colorless oil, 1H NMR (400 MHz, CDCl3)  0.05 (s, 6H), 0.89 (s, 9H), 1.23-1.53 (m, 12H), 1.99-2.07 (m, 2H), 3.60 (t, *J* = 6.6 Hz, 2H), 4.92 (d, *J* = 8.8 Hz, 1H), 4.99 (d, *J* = 17.1 Hz, 1H), 5.73-5.89 (m, 1H); 13C NMR (100 MHz, CDCl3)  -5.28, 18.35, 25.81, 25.98, 28.96, 29.10, 29.42, 29.51, 32.91, 33.84, 63.28, 114.13, 139.11.

**1-Benzyloxy-3-(*tert*-butyldimethylsilyl)oxypropane (1f).**6Colorless oil, 1H NMR (400 MHz, CDCl3)  0.05 (s, 6H), 0.89 (s, 9H), 1.82 (p, *J* = 6.4 Hz, 2H), 3.57 (t, *J* = 6.4 Hz, 2H), 3.72 (t, *J* = 6.4 Hz, 2H), 4.50 (s, 2H), 7.26-7.34 (m, 5H); 13C NMR (100 MHz, CDCl3)  -5.39, 18.28, 25.90, 32.98, 59.90, 67.00, 72.94, 127.42, 127.57, 128.28, 138.58.

**1-(*tert*-Butyldimethylsilyl)oxy-2-(2-propenyl)benzene (1g).**7Colorless oil, 1H NMR (400 MHz, CDCl3)  0.23 (s, 6H), 1.01 (s, 9H), 3.37 (d, *J* = 6.8 Hz, 2H), 5.02 (d, *J* = 3.9 Hz, 1H), 5.05 (s, 1H), 5.92-6.02 (m, 1H), 6.78 (d, *J* = 7.6 Hz, 1H), 6.89 (t, *J* = 7.6 Hz, 1H), 7.08 (t, *J* = 7.6 Hz, 1H), 7.13 (d, *J* = 7.6 Hz, 1H); 13C NMR (100 MHz, CDCl3)  -4.14, 18.26, 25.81, 34.44, 115.42, 118.40, 121.09, 127.04, 130.15, 130.68, 137.04, 153.35.

**1-(Triethylsilyl)oxy-9-decene (1h).** Colorless oil, 1H NMR (400 MHz, CDCl3)  0.60 (q, *J* = 8.0 Hz, 6H), 0.95 (t, *J* = 8.0 Hz, 9H), 1.29-1.37 (m, 10H), 1.51-1.55 (m, 2H), 2.03 (q, *J* = 7.0 Hz, 2H), 3.59 (t, *J* = 6.8 Hz, 2H), 4.92 (dd, *J* = 2.0 and 10.3 Hz, 1H), 4.99 (dd, *J* = 2.0 and 17.1 Hz, 1H), 5.76-5.86 (m, 1H); 13C NMR (100 MHz, CDCl3)  4.45, 6.76, 25.81, 28.92, 29.07, 29.40, 29.45, 32.93, 33.79, 62.97, 114.07, 139.20; MS (EI) *m/z* 213 (M+-57, 15%), 103 (100), 75 (33), 57 (15), 55 (14).

**Geranyl triethylsilyl ether (1i).**8Colorless oil, 1H NMR (400 MHz, CDCl3)  0.61 (q, *J* = 8.0 Hz, 6H), 0.97 (t, *J* = 8.0 Hz, 9H), 1.60 (s, 3H), 1.63 (s, 3H), 1.67 (s, 3H), 2.01 (t, *J* = 7.3 Hz, 2H), 2.10 (q, *J* = 7.3 Hz, 2H), 4.18 (d, *J* = 6.0 Hz, 2H), 5.10 (t, *J* = 7.3 Hz, 1H), 5.33 (t, *J* = 6.0 Hz, 1H).; HRMS (EI) Calcd for C16H32OSi (M+): 268.2222. Found: 268.2230.

**7-Methyl-5-(triethylsilyl)oxy-3-octyne (1j).** Colorless oil, 1H NMR (400 MHz, CDCl3)  0.62-0.72 (m, 6H), 0.90 and 0.91 (each d, *J* = 6.6 Hz, 3H), 0.98 (t, *J* = 7.8 Hz, 9H), 1.12 (t, *J* = 7.4 Hz, 3H), 1.43-1.61 (m, 2H), 1.78-1.84 (m, 1H), 2.19 and 2.20 (each q, *J* = 7.4 Hz, 1H), 4.38 (t, *J* = 7.1 Hz, 1H); 13C NMR (100 MHz, CDCl3)  4.91, 6.81, 12.41, 13.80, 22.47, 22.69, 24.55, 48.18, 61.38, 81.43, 85.60; MS (EI) *m/z* 225 (M+-29,100%), 197 (35), 171 (18), 141 (20), 111 (36), 103 (21), 75 (19), 44 (24).

**1-Phenyl-3-methyl-3-(triethylsilyl)oxy-1-pentyne (1k).**9Colorless oil, 1H NMR (400 MHz, CDCl3)  0.71 (q, *J* = 7.7 Hz , 6H), 0.98 (t, *J* = 7.7 Hz, 9H), 1.04 (t, *J* = 7.3 Hz , 3H), 1.55 (s, 3H), 1.68-1.79 (m, 2H), 7.29-7.31 (m, 3H), 7.38-7.41 (m, 2H); MS (EI) *m/z* 259 (M+-29, 100%), 187 (10), 149 (13), 61 (9), 44 (53).

**1-(*tert*-Butyldimethylsilyl)oxy-3-phenylpropane (2a).**1 Colorless oil, 1H NMR (400 MHz, CDCl3)  0.04 (s, 6H), 0.89 (s, 9H), 1.78-1.86 (m, 2H), 2.66 (t, *J* = 7.8 Hz, 2H), 3.62 (t, *J* = 6.4 Hz, 2H), 7.14-7.28 (m, 5H); 13C NMR (100 MHz, CDCl3)  -5.28, 18.31, 25.96, 32.10, 34.48, 62.33, 125.66, 128.26, 128.46, 142.23.

**1-(*tert*-Butyldiphenylsilyl)oxy-3-phenylpropane (2b).**10 Colorless oil, 1H NMR (400 MHz, CDCl3)  1.07 (s, 9H), 1.84-1.91 (m, 2H), 2.72 (t, *J* = 7.8 Hz, 2H), 3.69 (t, *J* = 6.4 Hz, 2H), 7.15-7.44 (m, 16H), 7.67 (dd, *J* = 1.5 and 7.8, 4H).

**1-(Triisopropylsilyl)oxy-3-phenylpropane (2c).**11 Colorless oil, 1H NMR (400 MHz, CDCl3)  1.04-1.12 (m, 3H and 18H), 1.82-1.89 (m, 2H), 2.71 (t, *J* = 7.8 Hz, 2H), 3.71 (t, *J* = 6.1 Hz, 2H), 7.17-7.29 (m, 5H).

**1-(Triethylsilyl)oxy-3-phenylpropane (2d).**4 Colorless oil, 1H NMR (400 MHz, CDCl3)  0.60 (q, *J* = 8.0 Hz, 6H), 0.96 (t, *J* = 8.0 Hz, 9H), 1.82-1.89 (m, 2H), 2.68 (t, *J* = 7.8 Hz, 2H), 3.64 (t, *J* = 6.4 Hz, 2H), 7.15-7.29 (m, 5H).

**1-(*tert*-Butyldimethylsilyl)oxydecane (2e).**12Colorless oil, 1H NMR (400 MHz, CDCl3)  0.05 (s, 6H), 0.88 (t, *J* = 7.3 Hz, 3H), 0.89 (s, 9H), 1.26-1.35 (m, 14H), 1.51-1.55 (m, 2H), 3.59 (t, *J* = 6.6 Hz, 2H); 13C NMR (100 MHz, CDCl3)  -5.26, 14.13, 18.39, 22.70, 25.81, 25.98, 29.37, 29.47, 29.60, 29.67, 31.92, 32.91, 63.34.

**3-(*tert*-Butyldimethylsilyl)oxy-1-propanol (2f).**6 Colorless oil, 1H NMR (400 MHz, CDCl3)  0.08 (s, 6H), 0.90 (s, 9H), 1.76-1.81 (m, 2H), 2.61 (brs, 1H), 3.80-3.84 (m, 2H), 3.84 (t, *J* = 5.6 Hz, 2H); 13C NMR (100 MHz, CDCl3)  -5.52, 18.17, 25.85, 34.13, 62.52, 62.99.

**1-(*tert*-Butyldimethylsilyl)oxy-2-propylbenzene (2g).** Colorless oil, 1H NMR (400 MHz, CDCl3)  0.23 (s, 6H), 0.94 (t, *J* = 7.5 Hz, 3H), 1.02 (s, 9H), 1.58 (hex, *J* = 7.5 Hz, 2H), 2.55 (t, *J* = 7.5 Hz, 2H), 6.77 (d, *J* = 7.6 Hz, 1H), 6.87 (t, *J* = 7.6 Hz, 1H), 7.05 (t, *J* = 7.6 Hz, 1H), 7.12 (d, *J* = 7.6 Hz, 1H); 13C NMR (100 MHz, CDCl3) -4.18, 14.09, 18.22, 23.29, 25.76, 32.73, 118.33, 120.86, 126.54, 130.18, 133.29, 153.54. Anal. Calcd for C15H26OSi: C, 71.93; H, 10.46. Found: C, 71.68; H, 10.60.

**1-(Triethylsilyl)oxydecane (2h).**13 Colorless oil, 1H NMR (400 MHz, CDCl3)  0.55 (q, *J* = 7.9 Hz, 6H), 0.89 (t, *J* = 6.8 Hz, 3H), 0.96 (t, *J* = 7.9 Hz, 9H), 1.22-1.36 (m, 14H) 1.51-1.54 (m, 2H), 3.59 (t, *J* = 6.6 Hz, 2H); MS (FAB:NBA) *m/z* 273 (M++H, 10%), 271 (8) , 243 (25), 214 (42), 115(22), 103(20).

**3,7-Dimethyl-1-(triethylsilyl)oxyoctane (2i).** Colorless oil, 1H NMR (400 MHz, CDCl3)  0.60 (q, *J* = 7.8 Hz, 6H), 0.86-0.88 (m, 9H), 0.96 (t, *J* = 7.8 Hz, 9H), 1.10-1.28 (m, 2H), 1.31-1.37 (m, 4H), 1.48-1.61 (m, 4H), 3.58-3.67 (m, 2H).; 13C NMR (100 MHz, CDCl3)  4.47, 6.77, 19.76, 22.61, 22.68, 24.66, 27.99, 29.56, 37.39, 39.29, 40.06, 61.23.; MS (EI) 257 (M+-15, 30), 243 (M+-29, 100), 217 (35), 205 (46), 189, (20), 117 (34), 115 (34), 103 (37), 87 (39), 83 (83), 75 (40), 69 (45), 57 (53), 55 (19).

**2-Methyl-4-(triethylsilyl)oxyoctane (2j).** Colorless oil, 1H NMR (400 MHz, CDCl3)  0.60 (q, *J* = 7.9 Hz, 6H)，0.87-0.89 (m, 9H), 0.69 (t, *J* = 7.9 Hz, 9H), 1.22-1.44 (m, 8H), 1.63-1.72 (m, 1H), 3.67-3.73 (m, 1H); 13C NMR (100 MHz, CDCl3)  5.24, 6.96, 14.09, 22.76, 22.94, 23.20, 24.51, 27.44, 37.46, 46.72, 70.64; MS (EI) 229 (M+-29, 99%), 201 (55), 173 (22), 115 (26), 103 (100), 87, (21), 75 (37), 44 (20).

**3-Methyl-1-phenyl-3-(triethylsilyl)oxypentane (2k).**9 Colorless oil, 1H NMR (270 MHz, CDCl3)  0.60 (q, *J* = 7.9 Hz, 6H), 0.88 (t, *J* = 7.4 Hz, 3H), 0.97 (t, *J* = 7.9 Hz, 9H), 1.23 (s, 3H), 1.55 (q, *J* = 7.4 Hz, 2H), 1.68-1.75 (m, 2H), 2.60-2.66 (m, 2H) , 7.14-7.26 (m, 3H), 7.27-7.30 (m, 2H).; 13C NMR (100 MHz, CDCl3)  6.99, 7.18, 8.75, 27.22, 30.59, 34.83, 43.72, 75.54, 125.50, 128.32, 143.28; MS (EI) *m/z* 263 (M+-29, 93%), 187 (33), 160 (13), 131 (10), 115, (20), 103 (100), 91 (23), 75(26), 44(14).

**References for Supplementary Information**

1. Sabitha, G.; Syamala, M.; Yadav, J. S. *Org. Lett.* **1999**, *1*, 1701-1703.
2. Hardinger, S. A.; Wijaya, N. *Tetrahedron Lett.* **1993**, *34*, 3821-3824.
3. Corey, E. J.; Yi, K. Y. *Tetrahedron Lett.* **1992**, *33*, 2289-2292.
4. Doyle, M. P.; High, K. G.; Bagheri, V.; Pieters, R. J.; Lewis, P. J.; Pearson, M. M. *J. Org. Chem.* **1990**, *55*, 6082-6086.
5. Marshall, J. A.; Hinkle, K. W. *J. Org. Chem.* **1997**, *62*, 5989-5995.
6. Itoh, A.; Kodama, T.; Maeda, S.; Masaki, Y. *Tetrahedron Lett.* **1998**, *39*, 9461-9464.
7. Ripa, L.; Hallberg, A. *J. Org. Chem.* **1997**, *62*, 595-602.
8. Wu, Y.; Huang, J.-H.; Shen, X.; Hu, Q.; Tang, C.-J.; Li, L. *Org. Lett.* **2002**, *13*, 2141-2144.
9. Gverdtsiteli, I. M.; Baramidze, L. V. *Soobshch. Akad. Nauk Gruz. USSR* **1968**, *50*, 83-86; *Chem. Abstr.* **1968**, *69*, 77336.
10. Sivak, A. J.; Cullo, L. A. U.S. Patent 4,970,329, November 13, 1990.
11. Oriyama, T.; Yatabe, K.; Sugawara, S; Machiguchi, Y.; Koga, G. *Synlett* **1996**, *6*, 523-525.
12. Farras, J.; Serra, C.; Vilarrasa, J. *Tetrahedron Lett.* **1998**, *39*, 327-330.
13. Gevorgyan, V.; Liu, J.-X.; Rubin, M.; Benson, S.; Yamamoto, Y. *Tetrahedron Lett.* **1999**, *40*, 8919-8922.

**Table 4.** The elimination of the possibility of a contaminated acid in 10% Pd/C-catalyzed cleavage of TBDMS and TES protective groups of **1a** and **1d**.

| Entry | Substrate | Pd/C | H2 | Additive | Product | Yield (%)*a* |
| --- | --- | --- | --- | --- | --- | --- |
| 1 | **1a** | ○ | × | － | **1a** (recovery) | 92 |
| 2 | **1a** | × | ○ | － | **1a** (recovery) | 99 |
| 3 | **1d** | ○ | × | － | **1d** (recovery) | 98 |
| 4 | **1d** | × | ○ | － | **1d** (recovery) | 87 |
| 5 | **1d** | ○ | ○ | Amberlite® (IRA-40)*b* | **3a** | 98*d* |
| 6 | **1d** | × | × | Amberlite® (IRA-40)*b* | **1d** (recovery) | 97 |
| 7 | **1d** | ○ | ○ | Amberlite® (IRA-410)*c* | **3a** | 95 *d* |

*a*Isolated yield. *b*Weakly basic gel-type resin. *c*Strongly basic gel-type resin. *d*Based on 1H NMR.

To eliminate the possibility of the methanolysis by a contaminated acid in Pd/C-catalyzed cleavage of the TBDMS and TES protective groups (Table 1 and Table 2 in the Text), the reactions of **1a** and **1d** were performed without the hydrogen or 10% Pd/C conditions (Table 4, Entries 1-4). As consequences of the reactions, no desilylation (methanolysis) occurred even after 24 h. Further, by the addition of a weekly basic gel-type resin, Amberlite® (IRA-40), or a strongly basic gel-type resin, Amberlite® (IRA-410), as an acid scavenger into the reaction mixture [0.25 mmol of **1d** and 10% Pd/C (10% of the weight of **1d**) in MeOH (1.0 mL) under hydrogen atmosphere (balloon) at room temperature for 24 h], no depression of the cleavage of the TES protective group was observed (Table 4, Entries 5 and 7).

**Table 5.** The addition of a small amount of MeOH or H2O in to the reaction mixture (0.1 mL/1.0 mL of MeCN or EtOAc).

| Substrate | Solvent | Additive | **2** : **3a***a* | Yield (%)*b* |
| --- | --- | --- | --- | --- |
| **1a** | EtOAc | MeOH | 100 (**2a**) : 0 | 86 (**2a**) |
| **1a** | MeCN | MeOH | 100 (**2a**) : 0 | 100 (**2a**) |
| **1a** | MeCN | H2O | 100 (**2a**) : 0 | 75 (**2a**) |
| **1d** | MeCN | MeOH | 100 (**2d**) : 0 | 94 (**2d**) |
| **1d** | MeCN | H2O | 100 (**2d**) : 0 | 95 (**2d**) |

*a*Determined by 1H NMR. *b*Isolated yield.

The stability of the TBDMS and TES groups of **1a** and **1d** by the addition of a small amount of MeOH or H2O (0.1 mL each) in to the reaction mixture [0.25 mmol of **1a** or **1d** and 10% Pd/C (10% of the weight of the substrate) in EtOAc or MeCN (1.0 mL) under hydrogen atmosphere (balloon) at room temperature for 24 h] were studied (Table 5). No hydrogenolysis of the TBDMS (**1a**) or TES (**1d**) ether was observed in all instances.

To eliminate the possibility of the effect of some contaminants generated under the hydrogenation conditions in Pd/C-catalyzed cleavage of the TBDMS or the TES protective group (Table 1 and Table 2 in the Text), we have demonstrated the following reaction.

10% Pd/C (6.2 mg) in MeOH (1.0 mL) was stirred at room temperature under hydrogen atmosphere for 6 h and then the catalyst was filtered off. The substrate (**1d**, 62.1 mg, 0.25 mmol) was stirred in the resulting filtrate under air atmosphere at room temperature for 24 h. This reaction gave only recovery (Scheme 1).

**Scheme 1.**
